# Supplementary material
Source: PubMed Central journal article supplement (PMC2735868)
Supplement: NIHMS101132-supplement-Supplemental_Table_1.pdf [file NIHMS101132-supplement-Supplemental_Table_1.pdf]

Suppl Table 1. SNPs association with daunorubicin IC<sub>50</sub>, gene expression in the combined and separated CEU and YRI populations using QTDT and linear regression analysis.

| SNP        | Host Gene |              |              |                      | Target Gene     |          |        | P values                      |                         | Gene expression and IC <sub>50</sub> | Population |
|------------|-----------|--------------|--------------|----------------------|-----------------|----------|--------|-------------------------------|-------------------------|--------------------------------------|------------|
|            | Location  | SNP location | Host gene ID | Transcript ClusterID | Target genes ID | Location | Effect | Genotype and IC <sub>50</sub> | Genotype and expression |                                      |            |
| rs2664420  | chr10     | intron       | CXXC6        | 3884830              | PPP1R16B        | chr20    | trans  | 0.00001                       | 0.000001                | 1.04E-05                             | CEU+YRI    |
| rs2664420  | chr10     | intron       | CXXC6        | 3884830              | ANAPC1          | chr20    | trans  | 0.00001                       | 0.000001                | 1.04E-05                             | CEU+YRI    |
| rs7704526  | chr5      | intron       | SLIT3        | 3735383              | GALR2           | chr17    | trans  | 0.00002                       | 0.000002                | 2.73E-03                             | CEU+YRI    |
| rs17128525 | chr8      | intron       | ChGn         | 3263555              | ADD3            | chr10    | trans  | 0.00002                       | 0.0000001               | 3.56E-04                             | CEU+YRI    |
| rs17128525 | chr8      | intron       | ChGn         | 3281068              | PIP5K2A         | chr10    | trans  | 0.00002                       | 0.000001                |                                      | CEU+YRI    |
| rs17128525 | chr8      | intron       | ChGn         | 3401804              | RAD51AP1        | chr12    | trans  | 0.00002                       | 0.000002                | 3.24E-02                             | CEU+YRI    |
| rs17128525 | chr8      | intron       | ChGn         | 3608398              | FURIN           | chr15    | trans  | 0.00002                       | 0.000003                | 4.77E-02                             | CEU+YRI    |
| rs944109   | chr20     | intron       | ANGPT4       | 2766289              | FLJ23235        | chr4     | trans  | 0.00003                       | 0.000003                | 3.70E-05                             | CEU+YRI    |
| rs7005075  | chr8      | intron       | ChGn         | 2320683              | TNFRSF8         | chr1     | trans  | 0.00003                       | 0.000002                |                                      | CEU+YRI    |
| rs7005075  | chr8      | intron       | ChGn         | 2447414              | FLJ25102        | chr1     | trans  | 0.00003                       | 0.000002                | 4.18E-02                             | CEU+YRI    |
| rs7005075  | chr8      | intron       | ChGn         | 2447414              | NCF2            | chr1     | trans  | 0.00003                       | 0.000002                | 4.18E-02                             | CEU+YRI    |
| rs7005075  | chr8      | intron       | ChGn         | 3263555              | ADD3            | chr10    | trans  | 0.00003                       | 0.0000004               | 3.56E-04                             | CEU+YRI    |
| rs220200   | chr21     | promoter     | LOC645401    | 3142217              | PAG1            | chr8     | trans  | 0.00004                       | 0.000003                | 4.39E-02                             | CEU+YRI    |
| rs220200   | chr21     | promoter     | ZNF295       | 3142217              | PAG1            | chr8     | trans  | 0.00004                       | 0.000003                | 4.39E-02                             | CEU+YRI    |
| rs220200   | chr21     | promoter     | C21orf121    | 3142217              | PAG1            | chr8     | trans  | 0.00004                       | 0.000003                | 4.39E-02                             | CEU+YRI    |
| rs6586840  | chr8      | intron       | ChGn         | 2320683              | TNFRSF8         | chr1     | trans  | 0.00004                       | 0.000002                |                                      | CEU+YRI    |
| rs6586840  | chr8      | intron       | ChGn         | 2447414              | FLJ25102        | chr1     | trans  | 0.00004                       | 0.000002                | 4.18E-02                             | CEU+YRI    |
| rs6586840  | chr8      | intron       | ChGn         | 2447414              | NCF2            | chr1     | trans  | 0.00004                       | 0.000002                | 4.18E-02                             | CEU+YRI    |
| rs6586840  | chr8      | intron       | ChGn         | 3263555              | ADD3            | chr10    | trans  | 0.00004                       | 0.0000003               | 3.56E-04                             | CEU+YRI    |
| rs944115   | chr20     | intron       | ANGPT4       | 2766289              | FLJ23235        | chr4     | trans  | 0.00005                       | 0.000001                | 3.70E-05                             | CEU+YRI    |
| rs220213   | chr21     | promoter     | LOC645401    | 3142217              | PAG1            | chr8     | trans  | 0.00005                       | 0.000003                | 4.39E-02                             | CEU+YRI    |
| rs220213   | chr21     | promoter     | C21orf121    | 3142217              | PAG1            | chr8     | trans  | 0.00005                       | 0.000003                | 4.39E-02                             | CEU+YRI    |
| rs220213   | chr21     | promoter     | ZNF295       | 3142217              | PAG1            | chr8     | trans  | 0.00005                       | 0.000003                | 4.39E-02                             | CEU+YRI    |
| rs9849144  | chr3      | tail         | OR5H6        | 2320374              | FBXO6           | chr1     | trans  | 0.00005                       | 0.000003                |                                      | CEU+YRI    |
| rs17195199 | chr3      | gene-near    | OR5H6        | 2320374              | FBXO6           | chr1     | trans  | 0.00005                       | 0.000003                |                                      | CEU+YRI    |
| rs9849144  | chr3      | tail         | OR5H6        | 2694931              | TMCC1           | chr3     | cis    | 0.00005                       | 0.000001                |                                      | CEU+YRI    |
| rs17195199 | chr3      | gene-near    | OR5H6        | 2694931              | TMCC1           | chr3     | cis    | 0.00005                       | 0.000001                |                                      | CEU+YRI    |

|            |       |           |           |         |          |       |       |         |           |                  |
|------------|-------|-----------|-----------|---------|----------|-------|-------|---------|-----------|------------------|
| rs9849144  | chr3  | tail      | OR5H6     | 2948587 | FLOT1    | chr6  | trans | 0.00005 | 0.000001  | CEU+YRI          |
| rs17195199 | chr3  | gene-near | OR5H6     | 2948587 | FLOT1    | chr6  | trans | 0.00005 | 0.000001  | CEU+YRI          |
| rs1265758  | chr6  | intron    | C6orf10   | 4048241 | HLA-DRB5 | chr6  | cis   | 0.00005 | 0.0000009 | CEU+YRI          |
| rs1265758  | chr6  | intron    | C6orf10   | 4048241 | HLA-DRB1 | chr6  | cis   | 0.00005 | 0.0000009 | CEU+YRI          |
| rs1265758  | chr6  | intron    | C6orf10   | 4048241 | HLA-DRB4 | chr6  | cis   | 0.00005 | 0.0000009 | CEU+YRI          |
| rs1265758  | chr6  | intron    | C6orf10   | 4048241 | HLA-DRB3 | chr6  | cis   | 0.00005 | 0.0000009 | CEU+YRI          |
| rs1265758  | chr6  | intron    | C6orf10   | 4048265 | HLA-DRB2 | chr6  | cis   | 0.00005 | 0.0000007 | CEU+YRI          |
| rs1265758  | chr6  | intron    | C6orf10   | 4048265 | HLA-DRB6 | chr6  | cis   | 0.00005 | 0.0000007 | CEU+YRI          |
| rs1265758  | chr6  | intron    | C6orf10   | 4048265 | HLA-DRB5 | chr6  | cis   | 0.00005 | 0.0000007 | CEU+YRI          |
| rs1265758  | chr6  | intron    | C6orf10   | 4048265 | HLA-DRB4 | chr6  | cis   | 0.00005 | 0.0000007 | CEU+YRI          |
| rs1265758  | chr6  | intron    | C6orf10   | 4048265 | HLA-DRB3 | chr6  | cis   | 0.00005 | 0.0000007 | CEU+YRI          |
| rs1265758  | chr6  | intron    | C6orf10   | 4048265 | HLA-DRB1 | chr6  | cis   | 0.00005 | 0.0000007 | CEU+YRI          |
| rs4705808  | chr5  | intron    | MCC       | 3275729 | IL2RA    | chr10 | trans | 0.00006 | 0.0000009 | 1.09E-05 CEU+YRI |
| rs4857357  | chr3  | gene-near | OR5H6     | 2813060 | PIK3R1   | chr5  | trans | 0.00007 | 0.000003  | CEU+YRI          |
| rs11743052 | chr5  | intron    | MCC       | 3275729 | IL2RA    | chr10 | trans | 0.00007 | 0.000002  | 1.09E-05 CEU+YRI |
| rs11744606 | chr5  | intron    | MCC       | 3275729 | IL2RA    | chr10 | trans | 0.00007 | 0.000002  | 1.09E-05 CEU+YRI |
| rs1997521  | chr5  | intron    | MCC       | 3275729 | IL2RA    | chr10 | trans | 0.00007 | 0.000002  | 1.09E-05 CEU+YRI |
| rs7724717  | chr5  | intron    | MCC       | 3275729 | IL2RA    | chr10 | trans | 0.00007 | 0.000002  | 1.09E-05 CEU+YRI |
| rs7724936  | chr5  | intron    | MCC       | 3275729 | IL2RA    | chr10 | trans | 0.00007 | 0.000002  | 1.09E-05 CEU+YRI |
| rs12518849 | chr5  | intron    | MCC       | 3275729 | IL2RA    | chr10 | trans | 0.00007 | 0.000002  | 1.09E-05 CEU+YRI |
| rs4705809  | chr5  | intron    | MCC       | 3275729 | IL2RA    | chr10 | trans | 0.00007 | 0.000003  | 1.09E-05 CEU+YRI |
| rs6859237  | chr5  | tail      | LOC643594 | 2345286 | LMO4     | chr1  | trans | 0.00008 | 0.0000007 | 1.97E-03 CEU+YRI |
| rs6859237  | chr5  | tail      | LOC442147 | 2345286 | LMO4     | chr1  | trans | 0.00008 | 0.0000007 | 1.97E-03 CEU+YRI |
| rs2053456  | chr2  | intron    | PPM1B     | 3838094 | FTL      | chr19 | trans | 0.00009 | 0.000003  | 1.02E-05 CEU+YRI |
| rs17756850 | chr6  | intron    | EXOC2     | 3721452 | FKBP10   | chr17 | trans | 0.00009 | 0.000001  | CEU+YRI          |
| rs2677111  | chr1  | intron    | USH2A     | 2319832 | APITD1   | chr1  | cis   | 0.0001  | 0.000003  | CEU+YRI          |
| rs2677111  | chr1  | intron    | USH2A     | 2319832 | CORT     | chr1  | cis   | 0.0001  | 0.000003  | CEU+YRI          |
| rs4844411  | chr1  | intron    | PLXNA2    | 3457336 | SILV     | chr12 | trans | 0.0001  | 0.000001  | CEU+YRI          |
| rs1831567  | chr13 | intron    | GPC5      | 2406926 | GRIK3    | chr1  | trans | 0.0001  | 0.000003  | CEU+YRI          |
| rs1831567  | chr13 | intron    | GPC5      | 3837193 | CCDC9    | chr19 | trans | 0.0001  | 0.0000005 | 3.84E-02 CEU+YRI |
| rs1412312  | chr13 | intron    | GPC5      | 3837193 | CCDC9    | chr19 | trans | 0.0001  | 0.0000006 | 3.84E-02 CEU+YRI |
| rs7327552  | chr13 | intron    | C13orf24  | 3944564 | CSF2RB   | chr22 | trans | 0.0001  | 0.000002  | CEU+YRI          |
| rs1958674  | chr14 | intron    | C14orf143 | 3972361 | MAGEB6B  | chrX  | trans | 0.0001  | 0.000003  | CEU+YRI          |
| rs1958674  | chr14 | intron    | C14orf143 | 3972361 | MAGEB6   | chrX  | trans | 0.0001  | 0.000003  | CEU+YRI          |
| rs10932125 | chr2  | intron    | NRP2      | 2548699 | CYP1B1   | chr2  | cis   | 0.0001  | 0.000001  | 3.26E-05 CEU+YRI |

|            |      |           |                      |         |          |       |       |          |           |          |         |
|------------|------|-----------|----------------------|---------|----------|-------|-------|----------|-----------|----------|---------|
| rs6888602  | chr5 | intron    | MCC                  | 3275729 | IL2RA    | chr10 | trans | 0.0001   | 0.0000007 | 1.09E-05 | CEU+YRI |
| rs4705807  | chr5 | intron    | MCC                  | 3275729 | IL2RA    | chr10 | trans | 0.0001   | 0.0000001 | 1.09E-05 | CEU+YRI |
| rs17135488 | chr5 | intron    | MCC                  | 3275729 | IL2RA    | chr10 | trans | 0.0001   | 0.0000003 | 1.09E-05 | CEU+YRI |
| rs6897941  | chr5 | intron    | SDCCAG10             | 3454006 | FMNL3    | chr12 | trans | 0.0001   | 0.0000007 | 1.08E-05 | CEU+YRI |
| rs17756826 | chr6 | intron    | EXOC2                | 3721452 | FKBP10   | chr17 | trans | 0.0001   | 0.0000001 |          | CEU+YRI |
| rs17756886 | chr6 | intron    | EXOC2                | 3721452 | FKBP10   | chr17 | trans | 0.0001   | 0.0000001 |          | CEU+YRI |
| rs7772761  | chr6 | intron    | EXOC2                | 3721452 | FKBP10   | chr17 | trans | 0.0001   | 0.0000001 |          | CEU+YRI |
| rs2702183  | chr1 | intron    | NMNAT2               | 2672333 | TESSP5   | chr3  | trans | 0.000007 | 0.0000003 |          | CEU     |
| rs1536984  | chr1 | intron    | NMNAT2               | 2672333 | TESSP5   | chr3  | trans | 0.00002  | 0.0000003 |          | CEU     |
| rs509168   | chr1 | intron    | NMNAT2               | 2672333 | TESSP5   | chr3  | trans | 0.00002  | 0.0000003 |          | CEU     |
| rs1541170  | chr1 | intron    | NMNAT2               | 2672333 | TESSP5   | chr3  | trans | 0.00002  | 0.0000003 |          | CEU     |
| rs1536984  | chr1 | intron    | NMNAT2               | 3825838 | FLJ44968 | chr19 | trans | 0.00002  | 0.0000003 |          | CEU     |
| rs1541170  | chr1 | intron    | NMNAT2               | 3825838 | FLJ44968 | chr19 | trans | 0.00002  | 0.0000003 |          | CEU     |
| rs509168   | chr1 | intron    | NMNAT2               | 3825838 | FLJ44968 | chr19 | trans | 0.00002  | 0.0000003 |          | CEU     |
| rs1536985  | chr1 | intron    | NMNAT2               | 2672333 | TESSP5   | chr3  | trans | 0.00003  | 0.0000002 |          | CEU     |
| rs2811557  | chr1 | intron    | NMNAT2               | 3825838 | FLJ44968 | chr19 | trans | 0.00004  | 0.0000002 |          | CEU     |
| rs481157   | chr1 | intron    | NMNAT2               | 3825838 | FLJ44968 | chr19 | trans | 0.00004  | 0.0000002 |          | CEU     |
| rs542349   | chr1 | intron    | NMNAT2               | 3825838 | FLJ44968 | chr19 | trans | 0.00004  | 0.0000002 |          | CEU     |
| rs2811553  | chr1 | intron    | NMNAT2               | 2672333 | TESSP5   | chr3  | trans | 0.00005  | 0.0000003 |          | CEU     |
| rs2788051  | chr1 | intron    | NMNAT2               | 2672333 | TESSP5   | chr3  | trans | 0.00006  | 0.0000002 |          | CEU     |
| rs12052523 | chr2 | gene-near | TM4SF20              | 2605674 | ILKAP    | chr2  | cis   | 0.00006  | 0.0000001 | 2.67E-02 | CEU     |
| rs12052523 | chr2 | gene-near | TM4SF20              | 2743800 | PCDH10   | chr4  | trans | 0.00006  | 0.0000001 | 4.29E-02 | CEU     |
| rs6726680  | chr2 | intron    | PPM1B                | 3770512 | FLJ40453 | chr17 | trans | 0.00006  | 0.0000006 |          | CEU     |
| rs6726680  | chr2 | intron    | PPM1B                | 3770512 | C17orf28 | chr17 | trans | 0.00006  | 0.0000006 |          | CEU     |
| rs2570367  | chr1 | promoter  | PARP1                | 3933566 | TMPRSS3  | chr21 | trans | 0.00008  | 0.0000002 |          | CEU     |
| rs1551315  | chr2 | intron    | PPM1B                | 2409507 | SLC6A9   | chr1  | trans | 0.00008  | 0.0000003 | 6.49E-03 | CEU     |
| rs1551315  | chr2 | intron    | PPM1B                | 3770512 | FLJ40453 | chr17 | trans | 0.00008  | 0.0000004 |          | CEU     |
| rs1551315  | chr2 | intron    | PPM1B                | 3770512 | C17orf28 | chr17 | trans | 0.00008  | 0.0000004 |          | CEU     |
| rs6544744  | chr2 | gene-near | LOC646790            | 3770512 | C17orf28 | chr17 | trans | 0.00008  | 0.0000006 |          | CEU     |
| rs6544746  | chr2 | intron    | PPM1B                | 3770512 | FLJ40453 | chr17 | trans | 0.00008  | 0.0000006 |          | CEU     |
| rs6544744  | chr2 | gene-near | LOC646790            | 3770512 | FLJ40453 | chr17 | trans | 0.00008  | 0.0000006 |          | CEU     |
| rs6544746  | chr2 | intron    | PPM1B                | 3770512 | C17orf28 | chr17 | trans | 0.00008  | 0.0000006 |          | CEU     |
| rs7602070  | chr2 | gene-near | LOC646790            | 3770512 | FLJ40453 | chr17 | trans | 0.00008  | 0.0000006 |          | CEU     |
| rs7602070  | chr2 | gene-near | LOC646790            | 3770512 | C17orf28 | chr17 | trans | 0.00008  | 0.0000006 |          | CEU     |
| rs3750518  | chr9 | gene-near | LOC286260,<br>MAN1B1 | 2775463 | HNRPD    | chr4  | trans | 0.00008  | 0.0000003 | 8.27E-04 | CEU     |
| rs3750518  | chr9 | intron    | LOC286260,<br>MAN1B1 | 2775463 | HNRPD    | chr4  | trans | 0.00008  | 0.0000003 | 8.27E-04 | CEU     |

|            |       |           |                      |         |           |       |       |           |           |          |     |
|------------|-------|-----------|----------------------|---------|-----------|-------|-------|-----------|-----------|----------|-----|
| rs9411307  | chr9  | intron    | MAN1B1               | 2775463 | HNRPD     | chr4  | trans | 0.00008   | 0.000003  | 8.27E-04 | CEU |
| rs3750518  | chr9  | intron    | LOC286260,<br>MAN1B1 | 3260937 | PEO1      | chr10 | trans | 0.00008   | 0.000003  |          | CEU |
| rs3750518  | chr9  | gene-near | LOC286260,<br>MAN1B1 | 3260937 | PEO1      | chr10 | trans | 0.00008   | 0.000003  |          | CEU |
| rs9411307  | chr9  | intron    | MAN1B1               | 3260937 | PEO1      | chr10 | trans | 0.00008   | 0.000003  |          | CEU |
| rs546435   | chr1  | intron    | NMNAT2               | 2672333 | TESSP5    | chr3  | trans | 0.00009   | 0.0000009 |          | CEU |
| rs2195830  | chr2  | intron    | KIAA1679             | 3360189 | TRIM68    | chr11 | trans | 0.00009   | 0.000002  | 1.66E-02 | CEU |
| rs7593987  | chr2  | gene-near | LOC646790            | 3770512 | C17orf28  | chr17 | trans | 0.00009   | 0.0000005 |          | CEU |
| rs7593987  | chr2  | gene-near | LOC646790            | 3770512 | FLJ40453  | chr17 | trans | 0.00009   | 0.0000005 |          | CEU |
| rs920519   | chr2  | intron    | PPM1B                | 3770512 | C17orf28  | chr17 | trans | 0.00009   | 0.0000005 |          | CEU |
| rs2054005  | chr2  | intron    | PPM1B                | 3770512 | FLJ40453  | chr17 | trans | 0.00009   | 0.0000005 |          | CEU |
| rs2054005  | chr2  | intron    | PPM1B                | 3770512 | C17orf28  | chr17 | trans | 0.00009   | 0.0000005 |          | CEU |
| rs2053456  | chr2  | intron    | PPM1B                | 3770512 | FLJ40453  | chr17 | trans | 0.00009   | 0.0000005 |          | CEU |
| rs2053456  | chr2  | intron    | PPM1B                | 3770512 | C17orf28  | chr17 | trans | 0.00009   | 0.0000005 |          | CEU |
| rs920519   | chr2  | intron    | PPM1B                | 3770512 | FLJ40453  | chr17 | trans | 0.00009   | 0.0000005 |          | CEU |
| rs623360   | chr1  | intron    | TRAF3IP3             | 3181460 | NANS      | chr9  | trans | 0.0001    | 0.000002  | 4.64E-05 | CEU |
| rs623360   | chr1  | intron    | TRAF3IP3             | 3761959 | SLC35B1   | chr17 | trans | 0.0001    | 0.000002  | 5.05E-03 | CEU |
| rs623360   | chr1  | intron    | TRAF3IP3             | 3844822 | THRAP5    | chr19 | trans | 0.0001    | 0.0000003 |          | CEU |
| rs623360   | chr1  | intron    | TRAF3IP3             | 3950452 | MGC11256  | chr22 | trans | 0.0001    | 0.000003  |          | CEU |
| rs12884348 | chr14 | tail      | LOC653751            | 3577612 | SERPINA2  | chr14 | cis   | 0.0001    | 0.000002  | 3.97E-02 | CEU |
| rs10083335 | chr14 | tail      | ERH                  | 3577612 | SERPINA1  | chr14 | cis   | 0.0001    | 0.000002  | 3.97E-02 | CEU |
| rs10083335 | chr14 | tail      | ERH                  | 3577612 | SERPINA2  | chr14 | cis   | 0.0001    | 0.000002  | 3.97E-02 | CEU |
| rs10142144 | chr14 | tail      | ERH                  | 3577612 | SERPINA1  | chr14 | cis   | 0.0001    | 0.000002  | 3.97E-02 | CEU |
| rs10142144 | chr14 | tail      | ERH                  | 3577612 | SERPINA2  | chr14 | cis   | 0.0001    | 0.000002  | 3.97E-02 | CEU |
| rs12884348 | chr14 | tail      | GALNTL1              | 3577612 | SERPINA1  | chr14 | cis   | 0.0001    | 0.000002  | 3.97E-02 | CEU |
| rs12884348 | chr14 | tail      | GALNTL1              | 3577612 | SERPINA2  | chr14 | cis   | 0.0001    | 0.000002  | 3.97E-02 | CEU |
| rs12884348 | chr14 | tail      | LOC653751            | 3577612 | SERPINA1  | chr14 | cis   | 0.0001    | 0.000002  | 3.97E-02 | CEU |
| rs6738023  | chr2  | intron    | PPM1B                | 3770512 | C17orf28  | chr17 | trans | 0.0001    | 0.0000009 |          | CEU |
| rs6738023  | chr2  | intron    | PPM1B                | 3770512 | FLJ40453  | chr17 | trans | 0.0001    | 0.0000009 |          | CEU |
| rs293381   | chr15 | intron    | ABHD2                | 3854954 | LRRC25    | chr19 | trans | 0.0000008 | 0.000002  | 1.61E-04 | YRI |
| rs2255796  | chr5  | intron    | TCOF1                | 3320717 | LOC284950 | chr11 | trans | 0.000004  | 0.000002  | 3.64E-04 | YRI |
| rs2255796  | chr5  | intron    | TCOF1                | 3320717 | MICAL2    | chr11 | trans | 0.000004  | 0.000002  | 3.64E-04 | YRI |
| rs7177792  | chr15 | intron    | ABHD2                | 3757399 | LOC400464 | chr17 | trans | 0.00001   | 0.0000003 | 4.13E-04 | YRI |
| rs7177792  | chr15 | intron    | ABHD2                | 3757399 | MGC20781  | chr17 | trans | 0.00001   | 0.0000003 | 4.13E-04 | YRI |
| rs3797443  | chr5  | intron    | IQGAP2               | 2946208 | HIST1H4B  | chr6  | trans | 0.00001   | 0.0000006 | 4.69E-02 | YRI |
| rs3797443  | chr5  | intron    | IQGAP2               | 2946208 | HIST2H4   | chr6  | trans | 0.00001   | 0.0000006 | 4.69E-02 | YRI |
| rs3797443  | chr5  | intron    | IQGAP2               | 2946319 | HIST1H4D  | chr6  | trans | 0.00001   | 0.0000003 | 5.53E-03 | YRI |

|            |       |           |           |         |           |       |       |         |           |          |     |
|------------|-------|-----------|-----------|---------|-----------|-------|-------|---------|-----------|----------|-----|
| rs3797443  | chr5  | intron    | IQGAP2    | 2946364 | HIST1H3F  | chr6  | trans | 0.00001 | 0.0000008 | 2.06E-02 | YRI |
| rs9655467  | chr7  | intron    | MGC11257  | 3472312 | SLC24A6   | chr12 | trans | 0.00001 | 0.0000007 |          | YRI |
| rs7223543  | chr17 | intron    | CA10      | 3601741 | CLK3      | chr15 | trans | 0.00002 | 0.000002  | 3.79E-03 | YRI |
| rs1263980  | chr17 | intron    | CA10      | 3601741 | CLK3      | chr15 | trans | 0.00004 | 0.000003  | 3.79E-03 | YRI |
| rs6603859  | chr1  | intron    | C1orf144  | 2950167 | TAP2      | chr6  | trans | 0.00005 | 0.000003  | 1.20E-02 | YRI |
| rs6603859  | chr1  | intron    | C1orf144  | 2999948 | OGDH      | chr7  | trans | 0.00005 | 0.000002  | 3.89E-02 | YRI |
| rs6603859  | chr1  | intron    | C1orf144  | 3315952 | RASSF7    | chr11 | trans | 0.00005 | 0.000001  | 5.29E-03 | YRI |
| rs6603859  | chr1  | intron    | C1orf144  | 3455973 | FLJ14800  | chr12 | trans | 0.00005 | 0.0000004 |          | YRI |
| rs6603859  | chr1  | intron    | C1orf144  | 3880767 | PYGB      | chr20 | trans | 0.00005 | 0.000002  | 8.42E-03 | YRI |
| rs6603859  | chr1  | intron    | C1orf144  | 3950726 | SAPS2     | chr22 | trans | 0.00005 | 0.000001  | 1.60E-02 | YRI |
| rs6603859  | chr1  | intron    | C1orf144  | 3950726 | LOC442582 | chr22 | trans | 0.00005 | 0.000001  | 1.60E-02 | YRI |
| rs10887684 | chr10 | intron    | SNCG      | 2949197 | C6orf47   | chr6  | trans | 0.00005 | 0.000003  | 1.43E-02 | YRI |
| rs10887684 | chr10 | intron    | SNCG      | 3950726 | SAPS2     | chr22 | trans | 0.00005 | 0.000002  | 1.60E-02 | YRI |
| rs10887684 | chr10 | intron    | SNCG      | 3950726 | LOC442582 | chr22 | trans | 0.00005 | 0.000002  | 1.60E-02 | YRI |
| rs7929521  | chr11 | intron    | LOC645490 | 2376849 | RPL7A     | chr1  | trans | 0.00005 | 0.000002  | 2.28E-03 | YRI |
| rs7929521  | chr11 | intron    | LOC645490 | 2376849 | RASSF5    | chr1  | trans | 0.00005 | 0.000002  | 2.28E-03 | YRI |
| rs7929521  | chr11 | intron    | LOC645490 | 2376849 | IKBKE     | chr1  | trans | 0.00005 | 0.000002  | 2.28E-03 | YRI |
| rs7929521  | chr11 | intron    | LOC645490 | 2773756 | G3BP2     | chr4  | trans | 0.00005 | 0.000003  |          | YRI |
| rs7929521  | chr11 | intron    | LOC645490 | 3603199 | IDH3A     | chr15 | trans | 0.00005 | 0.0000006 | 5.28E-03 | YRI |
| rs7929521  | chr11 | intron    | LOC645490 | 3837132 | SAE1      | chr19 | trans | 0.00005 | 0.000003  |          | YRI |
| rs7929521  | chr11 | intron    | LOC645490 | 3888383 | SLC9A8    | chr20 | trans | 0.00005 | 0.000003  | 8.26E-03 | YRI |
| rs6503253  | chr17 | gene-near | LOC644070 | 3340449 | SLCO2B1   | chr11 | trans | 0.00005 | 0.000002  | 1.27E-02 | YRI |
| rs6503253  | chr17 | gene-near | LOC644070 | 3707214 | PLD2      | chr17 | cis   | 0.00005 | 0.000003  | 4.12E-02 | YRI |
| rs1862876  | chr5  | intron    | STK32A    | 2450798 | LAD1      | chr1  | trans | 0.00007 | 0.0000008 | 1.23E-03 | YRI |
| rs1862876  | chr5  | intron    | STK32A    | 3886938 | WFDC2     | chr20 | trans | 0.00007 | 0.0000002 | 1.92E-03 | YRI |
| rs9730073  | chr1  | intron    | FMN2      | 3237788 | C10orf112 | chr10 | trans | 0.00008 | 0.000003  | 1.58E-02 | YRI |
| rs9730073  | chr1  | intron    | FMN2      | 3237788 | PLXDC2    | chr10 | trans | 0.00008 | 0.000003  | 1.58E-02 | YRI |
| rs293382   | chr15 | intron    | ABHD2     | 3757399 | MGC20781  | chr17 | trans | 0.00008 | 0.0000001 | 4.13E-04 | YRI |
| rs293382   | chr15 | intron    | ABHD2     | 3757399 | LOC400464 | chr17 | trans | 0.00008 | 0.0000001 | 4.13E-04 | YRI |
| rs2664420  | chr10 | intron    | CXXC6     | 3393704 | LOC196264 | chr11 | trans | 0.00009 | 0.0000008 |          | YRI |
| rs7529524  | chr1  | intron    | KCNH1     | 3104698 | ZBTB10    | chr8  | trans | 0.0001  | 0.000002  | 3.74E-02 | YRI |
| rs16852022 | chr1  | gene-near | LOC440567 | 3178679 | GADD45G   | chr9  | trans | 0.0001  | 0.000001  | 3.65E-02 | YRI |
| rs12250538 | chr10 | intron    | TCERG1L   | 2824089 | TIGA1     | chr5  | trans | 0.0001  | 0.0000004 | 3.09E-04 | YRI |
| rs12783321 | chr10 | intron    | KIAA1975  | 3334571 | RPS6KA4   | chr11 | trans | 0.0001  | 0.000001  | 1.10E-02 | YRI |
| rs12250538 | chr10 | intron    | TCERG1L   | 3382948 | CLNS1A    | chr11 | trans | 0.0001  | 0.000001  | 2.23E-04 | YRI |
| rs12250538 | chr10 | intron    | TCERG1L   | 3625234 | C15orf15  | chr15 | trans | 0.0001  | 0.000003  | 5.82E-05 | YRI |
| rs12250538 | chr10 | intron    | TCERG1L   | 3625234 | LOC148198 | chr15 | trans | 0.0001  | 0.000003  | 5.82E-05 | YRI |

|            |       |        |           |         |           |       |       |        |          |          |     |
|------------|-------|--------|-----------|---------|-----------|-------|-------|--------|----------|----------|-----|
| rs12250538 | chr10 | intron | TCERG1L   | 3625234 | LOC284288 | chr15 | trans | 0.0001 | 0.000003 | 5.82E-05 | YRI |
| rs12783321 | chr10 | intron | KIAA1975  | 3677662 | NOD3      | chr16 | trans | 0.0001 | 0.000003 |          | YRI |
| rs6552429  | chr4  | tail   | LOC643179 | 2946319 | HIST1H4D  | chr6  | trans | 0.0001 | 0.000003 | 5.53E-03 | YRI |
